# Supplementary material for: Using the Machine Learning Method to Study the Environmental Footprints Embodied in Chinese Diet
Source: Int J Environ Res Public Health. 2020 Oct 8;17(19):7349. doi: 10.3390/ijerph17197349 (PMC7579113; doi:10.3390/ijerph17197349)
Supplement: Supplementary file 1 [file ijerph-17-07349-s001.xlsx]

## Sheet: S1
S1 Correlation Test
Water Footprint Correlation
		Age	Gender	Region	Education Level	Income Level	Physical Activity	BMI
Age	Pearson Correlations		0.0072622	-7.49412e-05	-.233**	-0.0104316	-0.00719296	.092**
	Sig. (2-tailed)		0.329922	0.991978	1.58215e-219	0.161669	0.334554	3.17254e-35
Gender	Pearson Correlations	0.0072622		0.0044567	-.064**	-0.0134732	-.109**	-.061**
	Sig. (2-tailed)	0.329922		0.549913	7.47563e-18	0.0706717	8.18183e-49	1.84833e-16
Region	Pearson Correlations	-7.49412e-05	0.0044567		-.301**	-.298**	.255**	-0.00689122
	Sig. (2-tailed)	0.991978	0.549913		0	0	2.44239e-265	0.355226
Education Level	Pearson Correlations	-.233**	-.064**	-.301**		.334**	-.288**	-.036**
	Sig. (2-tailed)	1.58215e-219	7.47563e-18	0		0	0	1.14022e-06
Income Level	Pearson Correlations	-0.0104316	-0.0134732	-.298**	.334**		-.213**	.023**
	Sig. (2-tailed)	0.161669	0.0706717	0	0		8.15306e-184	0.00194459
Physical Activity	Pearson Correlations	-0.00719296	-.109**	.255**	-.288**	-.213**		-0.0132246
	Sig. (2-tailed)	0.334554	8.18183e-49	2.44239e-265	0	8.15306e-184		0.076026
BMI	Pearson Correlations	.092**	-.061**	-0.00689122	-.036**	.023**	-0.0132246
	Sig. (2-tailed)	3.17254e-35	1.84833e-16	0.355226	1.14022e-06	0.00194459	0.076026
**. In the degree of 0.01（two-tailed），which is significant correlation.
*. In the degree of 0.05（two-tailed），which is significant correlation.
Carbon Footprint Correlation
		Age	Gender	Region	Education Level	Income Level	Physical Activity	BMI
Age	Pearson Correlations		0.00778295	0.00312259	-.247**	-.016*	-0.00186998	.083**
	Sig. (2-tailed)		0.296422	0.675281	2.33751e-247	0.0332612	0.801916	3.82928e-29
Gender	Pearson Correlations	0.00778295		0.00369604	-.079**	-.019**	-.100**	-.077**
	Sig. (2-tailed)	0.296422		0.620005	3.03495e-26	0.00954076	1.80787e-41	2.53633e-25
Region	Pearson Correlations	0.00312259	0.00369604		-.290**	-.306**	.256**	0.00807285
	Sig. (2-tailed)	0.675281	0.620005		0	0	1.96666e-267	0.278796
Education Level	Pearson Correlations	-.247**	-.079**	-.290**		.342**	-.288**	-.035**
	Sig. (2-tailed)	2.33751e-247	3.03495e-26	0		0	0	2.64808e-06
Income Level	Pearson Correlations	-.016*	-.019**	-.306**	.342**		-.219**	0.00499089
	Sig. (2-tailed)	0.0332612	0.00954076	0	0		5.89439e-195	0.503141
Physical Activity	Pearson Correlations	-0.00186998	-.100**	.256**	-.288**	-.219**		-.025**
	Sig. (2-tailed)	0.801916	1.80787e-41	1.96666e-267	0	5.89439e-195		0.000893878
BMI	Pearson Correlations	.083**	-.077**	0.00807285	-.035**	0.00499089	-.025**
	Sig. (2-tailed)	3.82928e-29	2.53633e-25	0.278796	2.64808e-06	0.503141	0.000893878
**. In the degree of 0.01（two-tailed），which is significant correlation.
*. In the degree of 0.05（two-tailed），which is significant correlation.
Ecological Footprint Correlation
		Age	Gender	Region	Education Level	Income Level	Physical Activity	BMI
Age	Pearson Correlations		-.018*	-0.00580827	-.245**	-.015*	0.00357819	.088**
	Sig. (2-tailed)		0.0180816	0.435854	7.35994e-245	0.0465163	0.631204	2.5904e-32
Gender	Pearson Correlations	-.018*		-0.012097	-.066**	-.024**	-.106**	-.076**
	Sig. (2-tailed)	0.0180816		0.104605	6.93894e-19	0.0016015	3.13185e-46	3.10324e-24
Region	Pearson Correlations	-0.00580827	-0.012097		-.301**	-.309**	.266**	-0.0134128
	Sig. (2-tailed)	0.435854	0.104605		0	0	4.04817e-290	0.0719448
Education Level	Pearson Correlations	-.245**	-.066**	-.301**		.342**	-.289**	-.040**
	Sig. (2-tailed)	7.35994e-245	6.93894e-19	0		0	0	1.0614e-07
Income Level	Pearson Correlations	-.015*	-.024**	-.309**	.342**		-.226**	-0.00336868
	Sig. (2-tailed)	0.0465163	0.0016015	0	0		2.76576e-206	0.651323
Physical Activity	Pearson Correlations	0.00357819	-.106**	.266**	-.289**	-.226**		-0.0129498
	Sig. (2-tailed)	0.631204	3.13185e-46	4.04817e-290	0	2.76576e-206		0.0823265
BMI	Pearson Correlations	.088**	-.076**	-0.0134128	-.040**	-0.00336868	-0.0129498
	Sig. (2-tailed)	2.5904e-32	3.10324e-24	0.0719448	1.0614e-07	0.651323	0.0823265
*. In the degree of 0.05（two-tailed），which is significant correlation.
**. In the degree of 0.01（two-tailed），which is significant correlation.
